# Supplementary material for: A novel glycosyltransferase from Bacillus subtilis achieves zearalenone detoxification by diglycosylation modification
Source: Royal Society of Chemistry journal article supplement (doi:10.1039/d4fo00872c), 2024-01-01
Supplement: d4fo00872c1.pdf [file d4fo00872c1.pdf]

## Supplementary material

Table S1. Primers used to clone the 16S rDNA and *gyrA* genes

| Primer         | Sequence (5'-3')             |
|----------------|------------------------------|
| 16S-27F        | AGAGTTTGATCCTGG CTCAG        |
| 16S-1492R      | CTACGGCTACCTTGTACGA          |
| <i>gyrA</i> -f | CAGTCAGGAAATGCGTACG<br>TCCTT |
| <i>gyrA</i> -r | CAAGGTAATGCTCCAGGCATTGC<br>T |

Table. S2 Primers used to clone the glycosyltransferase gene.

| Primer | Sequence (5'-3')                                 |
|--------|--------------------------------------------------|
| 1      | F CCTACGCTTGCTTTAGT<br>R GGCTTTCTTTTCCTTC        |
| 2      | F AGAACGGAAGGAAAAAG<br>R AGGCTGGAAACAGTCAC       |
| 3      | F CGCTGGCTGGTAAATTGTTT<br>R GTTGGCTGTACTAGTGAACG |
| 4      | F TTGACAGACCACACATGTTT<br>R ATTTAATGCTTCCGGCACAG |
| 5      | F CGTCATTCCGCAAATGTATG<br>R GCAAACCAAGGGAGAAATCA |
